# Supplementary material for: Design of a solar-driven TiO2 nanofilm on Ti foil by self-structure modifications
Source: Royal Society of Chemistry journal article supplement (doi:10.1039/c5ra05367f), 2015-01-01
Supplement: c5ra05367f1.pdf [file c5ra05367f1.pdf]

## Electronic Supporting Information

### Design of solar-driven TiO<sub>2</sub> nanofilm on Ti foil by self-structure modifications

Yan Liu\*<sup>a</sup>, Kangsheng Mu\*<sup>a</sup>, Jiandan Zhong<sup>a</sup>, Keni Chen<sup>a</sup>, Yanzong Zhang<sup>† a,b</sup>, Gang Yang<sup>a,b</sup>, Lilin Wang<sup>a,b</sup>, Shihuai Deng<sup>a,b</sup>, Fei Shen<sup>a,b</sup>, and Xiaohong Zhang<sup>a,b</sup>

<sup>a</sup>College of Environment, Sichuan Agricultural University, Chengdu, Sichuan 611130, China.

<sup>b</sup>Sichuan Engineering and Technical Center for Rural Environmental Protection, Sichuan Agricultural University, Chengdu 611130, Sichuan, PR China.

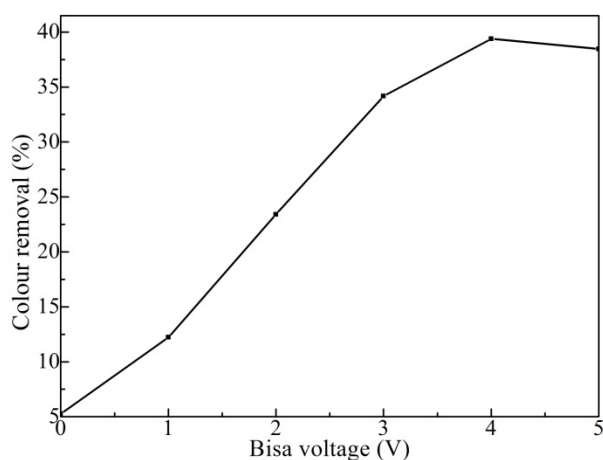

**Fig.S1** The effect of different bias potential on the MO degradation ( $C_{MO}=20$  mg/L,  $V_{MO}=40$  mL, pH=6.8, degradation time=30 min).

The degradation rate increased with the increase of bias voltage in the range of 0 V to 4 V. Increasing the bias voltage to 5 V failed to improve the degradation rate. So, the bias voltage of 4 V was chosen to apply for the photoelectrocatalytic activity measurement.

---

\* These authors contributed equally to this work (co-first authors).

† Corresponding author: E-mail address: yzzhang@sicau.edu.cn (Y. Zhang).

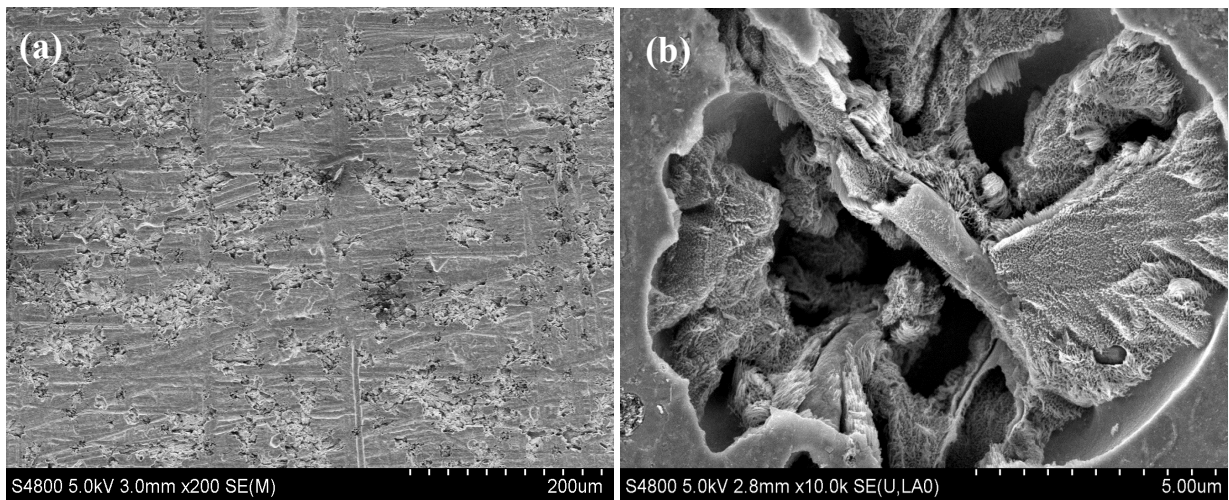

**Fig.S2** (a) FE-SEM images of the the oxide layer after dielectric breakdown in HNO<sub>3</sub> electrolyte, (b) partial enlarged view of the inhomogeneous hole.

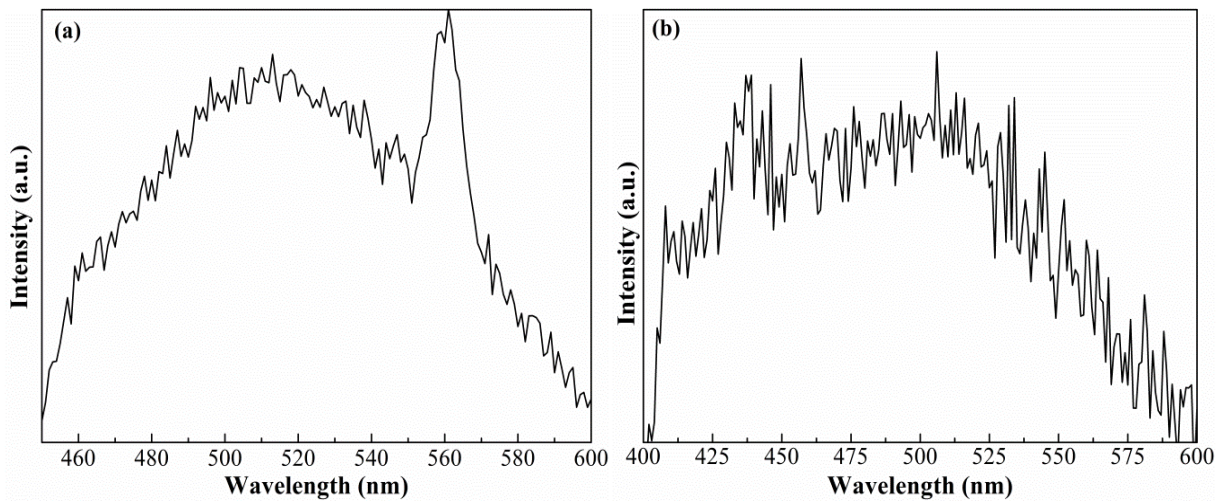

**Fig.S3** PL spectra of the Vo-N-TiO<sub>2</sub> (A/R) film with different excitation wavelengths, (a) 280 nm, and (b) 354 nm.
